# Supplementary material for: Migration distance and maternal resource allocation determine timing of birth in a large herbivore
Source: PubMed Central journal article supplement — Ecology. 2021 Apr 30;102(6):e03334. doi: 10.1002/ecy.3334 (PMC8243980; doi:10.1002/ecy.3334), 2021-04-30
Supplement: ECY-102-e03334-s004.pdf [file ECY-102-e03334-s004.pdf]

**Supporting Information.** Aikens, E.O., S.P.H. Dwinell, T.N. LaSharr, R.P. Jakopak, G.L. Fralick, J. Randall, R. Kaiser, M. Thonhoff, M.J. Kauffman, and K.L. Monteith. 2021. Migration distance and maternal resource allocation determine timing of birth in a large herbivore. *Ecology*.

#### **Appendix S4** – Examining the impact of repeated measures on inference

Repeated measures, where the same adult female was included in our analysis in multiple years, accounted for 20-28% of the datapoints in our analysis (Table S1). The maximum number of years an individual was included in our analysis was two, but most adult females had complete data for only one year of the study (Table S1). We investigated how repeated measures impacted our analysis by, 1) randomly subsampling our data to remove repeated measures and 2) accounting for repeated measures by including a random intercept for maternal ID. We considered if the original coefficient estimates fell within the 95% CI of the coefficient estimates derived from the subsampled model or the model including a random intercept for maternal ID. Additionally, we investigated if the significance of any effect changed as a result of removing or accounting for repeated measures, by assessing if the 95% CI of the estimated coefficients overlapped with zero. In all cases, we found that the original coefficient estimate always fell within the 95% CI of the models that removed or accounted for pseudoreplication and that the significance of estimated coefficients was consistent irrespective of model choice (Table S2). Furthermore, including a random intercept for ID, when most IDs only had one data point often resulted in estimated variance for the random term to be zero or close to zero, indicating very little effect of including a random term.

**Table S1.** A summary of the number of birth events used in various stages of analyses.

| Analysis                                | Sample size | Unique individuals | Number of individuals measured once | Number of individuals measured twice | Proportion of repeated measures in data |
|-----------------------------------------|-------------|--------------------|-------------------------------------|--------------------------------------|-----------------------------------------|
| Plasticity in birth                     | 78          | 56                 | 34                                  | 22                                   | 0.28                                    |
| Fetal development                       | 50          | 40                 | 30                                  | 10                                   | 0.20                                    |
| Birth Timing & birth date               | 77          | 56                 | 35                                  | 21                                   | 0.27                                    |
| Green-wave surfing and migration timing | 78          | 56                 | 34                                  | 22                                   | 0.28                                    |

**Table S2.** Summary of model output from original models and models that removed repeated measures or accounted for repeated measures with a random term.

| Approach                                                                                       | Coefficient         | Estimate | Standard error | Lower CI (2.5%) | Upper CI (97.5%) | CIs overlap with original? |
|------------------------------------------------------------------------------------------------|---------------------|----------|----------------|-----------------|------------------|----------------------------|
| <b>(a) Fetal development in March (Fetal eye diameter ~ migration distance + December fat)</b> |                     |          |                |                 |                  |                            |
| Original                                                                                       | Intercept*          | 15.86    | 1.04           | 13.76           | 17.96            | NA                         |
|                                                                                                | Migration distance* | -0.02    | 0.01           | -0.04           | -0.01            | NA                         |
|                                                                                                | December fat*       | 0.17     | 0.07           | 0.03            | 0.30             | NA                         |
| Subsampled                                                                                     | Intercept*          | 16.02    | 1.14           | 13.70           | 18.34            | Yes                        |
|                                                                                                | Migration distance* | -0.02    | 0.01           | -0.04           | -0.01            | Yes                        |
|                                                                                                | December fat*       | 0.17     | 0.07           | 0.02            | 0.31             | Yes                        |
| Random effect + (1   ID)†                                                                      | Intercept *         | 15.86    | 1.04           | 13.84           | 17.88            | Yes                        |
|                                                                                                | Migration distance* | -0.02    | 0.01           | -0.04           | -0.01            | Yes                        |
|                                                                                                | December fat*       | 0.17     | 0.07           | 0.03            | 0.30             | Yes                        |
| Outliers removed                                                                               | Intercept*          | 16.52    | 0.79           | 14.93           | 18.11            | Yes                        |
|                                                                                                | Migration distance* | -0.02    | 0.01           | -0.03           | -0.01            | Yes                        |
|                                                                                                | December fat*       | 0.11     | 0.05           | 0.01            | 0.22             | Yes                        |
| <b>(b) Plasticity in birth (Days to birth ~ eye diameter + fetal number + Year)</b>            |                     |          |                |                 |                  |                            |
| Original                                                                                       | Intercept*          | 133.94   | 7.38           | 119.23          | 148.65           | NA                         |
|                                                                                                | Eye Diameter*       | -2.74    | 0.42           | -3.58           | -1.90            | NA                         |
|                                                                                                | Fetal Number        | -2.73    | 1.46           | -5.64           | 0.18             | NA                         |
| Subsampled                                                                                     | Intercept*          | 126.41   | 11.00          | 104.30          | 148.52           | Yes                        |
|                                                                                                | Eye Diameter*       | -2.30    | 0.65           | -3.60           | -1.00            | Yes                        |
|                                                                                                | Fetal Number        | -2.80    | 1.90           | -6.27           | 1.02             | Yes                        |
| Random effect + (1   ID)                                                                       | Intercept*          | 135.02   | 7.06           | 121.64          | 148.54           | Yes                        |
|                                                                                                | Eye Diameter*       | -2.79    | 0.42           | -3.59           | -2.01            | Yes                        |
|                                                                                                | Fetal Number *      | -3.15    | 1.32           | -5.65           | -0.63            | Yes                        |

| <b>(c) Birth Timing (Days to birth ~eye diameter + date peak green-up on winter range + date peak green-up on summer range + exposure to green-up + date peak green-up + March fat)</b> |                                   |        |       |        |        |     |
|-----------------------------------------------------------------------------------------------------------------------------------------------------------------------------------------|-----------------------------------|--------|-------|--------|--------|-----|
| Original                                                                                                                                                                                | Intercept*                        | 90.97  | 12.56 | 65.92  | 116.03 | NA  |
|                                                                                                                                                                                         | Eye Diameter*                     | -2.69  | 0.42  | -3.52  | -1.85  | NA  |
|                                                                                                                                                                                         | Fetal Number                      | -1.30  | 1.76  | -4.80  | 2.20   | NA  |
|                                                                                                                                                                                         | Date peak green-up winter range*  | 0.38   | 0.09  | 0.21   | 0.56   | NA  |
|                                                                                                                                                                                         | Exposure to green-up (IRG)*       | -25.26 | 5.61  | -36.45 | -14.07 | NA  |
|                                                                                                                                                                                         | Date peak green-up at birth site* | 0.17   | 0.06  | 0.05   | 0.29   | NA  |
|                                                                                                                                                                                         | March fat                         | -0.63  | 0.40  | -1.42  | 0.15   | NA  |
| Subsampled                                                                                                                                                                              | Intercept*                        | 89.51  | 15.18 | 58.99  | 120.03 | Yes |
|                                                                                                                                                                                         | Eye Diameter*                     | -2.26  | 0.52  | -3.31  | -1.21  | Yes |
|                                                                                                                                                                                         | Fetal Number                      | -0.13  | 2.31  | -4.78  | 4.52   | Yes |
|                                                                                                                                                                                         | Date peak green-up winter range*  | 0.31   | 0.11  | 0.10   | 0.52   | Yes |
|                                                                                                                                                                                         | Exposure to green-up (IRG)*       | -26.00 | 6.81  | -39.69 | -12.32 | Yes |
|                                                                                                                                                                                         | Date peak green-up at birth site* | 0.19   | 0.08  | 0.03   | 0.34   | Yes |
|                                                                                                                                                                                         | March fat                         | -0.81  | 0.45  | -1.72  | 0.11   | Yes |
| Random effect + (1 ID)†                                                                                                                                                                 | Intercept*                        | 90.97  | 12.56 | 67.20  | 114.75 | Yes |
|                                                                                                                                                                                         | Eye Diameter*                     | -2.69  | 0.42  | -3.47  | -1.90  | Yes |
|                                                                                                                                                                                         | Fetal Number                      | -1.30  | 1.76  | -4.63  | 2.02   | Yes |
|                                                                                                                                                                                         | Date peak green-up winter range*  | 0.38   | 0.09  | 0.22   | 0.55   | Yes |
|                                                                                                                                                                                         | Exposure to green-up (IRG)*       | -25.26 | 5.61  | -35.88 | -14.64 | Yes |
|                                                                                                                                                                                         | Date peak green-up at birth site* | 0.17   | 0.06  | 0.06   | 0.28   | Yes |
|                                                                                                                                                                                         | March fat                         | -0.63  | 0.40  | -1.38  | 0.11   | Yes |
| <b>(d) Birth mass ~ plasticity in birth date + fetal number + exposure to green-up + March fat</b>                                                                                      |                                   |        |       |        |        |     |
| Original                                                                                                                                                                                | Intercept*                        | 2.62   | 0.42  | 1.78   | 3.45   | NA  |
|                                                                                                                                                                                         | Plasticity in birth date          | 0.001  | 0.02  | -0.03  | 0.03   | NA  |
|                                                                                                                                                                                         | Fetal number                      | 0.14   | 0.18  | -0.22  | 0.50   | NA  |
|                                                                                                                                                                                         | Exposure to green-up (IRG)        | 0.89   | 0.58  | -0.27  | 2.04   | NA  |
|                                                                                                                                                                                         | March fat                         | 0.02   | 0.04  | -0.06  | 0.10   | NA  |
| Subsampled                                                                                                                                                                              | Intercept*                        | 2.39   | 0.53  | 1.32   | 3.45   | Yes |
|                                                                                                                                                                                         | Plasticity in birth date          | 0.01   | 0.02  | -0.03  | 0.05   | Yes |

|                                                                          |                                   |        |       |        |        |     |
|--------------------------------------------------------------------------|-----------------------------------|--------|-------|--------|--------|-----|
|                                                                          | Fetal number                      | 0.13   | 0.23  | -0.33  | 0.58   | Yes |
|                                                                          | Exposure to green-up (IRG)        | 1.38   | 0.74  | -0.10  | 2.86   | Yes |
|                                                                          | March fat                         | 0.01   | 0.04  | -0.08  | 0.10   | Yes |
| Random effect + (1 ID)                                                   | Intercept*                        | 2.73   | 0.41  | 1.89   | 3.54   | Yes |
|                                                                          | Plasticity in birth date          | -0.007 | 0.02  | -0.05  | 0.04   | Yes |
|                                                                          | Fetal number                      | 0.09   | 0.18  | -0.26  | 0.46   | Yes |
|                                                                          | Exposure to green-up (IRG)        | 0.79   | 0.59  | -0.37  | 1.92   | Yes |
|                                                                          | March fat                         | 0.02   | 0.04  | -0.05  | 0.10   | Yes |
| <b>(e) Date of birth ~ end of spring migration</b>                       |                                   |        |       |        |        |     |
| Original                                                                 | Intercept*                        | 137.66 | 7.18  | 123.36 | 151.97 | NA  |
|                                                                          | End of spring migration*          | 0.19   | 0.05  | 0.09   | 0.29   | NA  |
| Subsampled                                                               | Intercept*                        | 138.16 | 7.99  | 122.15 | 154.17 | Yes |
|                                                                          | End of spring migration*          | 0.18   | 0.06  | 0.07   | 0.30   | Yes |
| Random effect + (1 ID) <sup>†</sup>                                      | Intercept*                        | 137.66 | 7.18  | 123.60 | 151.73 | Yes |
|                                                                          | End of spring migration*          | 0.19   | 0.05  | 0.09   | 0.29   | Yes |
| <b>(f) End of spring migration ~ date of peak green-up at birth site</b> |                                   |        |       |        |        |     |
| Original                                                                 | Intercept*                        | 38.28  | 14.28 | 9.84   | 66.71  | NA  |
|                                                                          | Date peak green-up at birth site* | 0.77   | 0.11  | 0.56   | 0.98   | NA  |
| Subsampled                                                               | Intercept*                        | 46.41  | 17.86 | 10.60  | 82.22  | Yes |
|                                                                          | Date peak green-up at birth site* | 0.70   | 0.13  | 0.44   | 0.97   | Yes |
| Random effect + (1 ID)                                                   | Intercept*                        | 46.48  | 14.92 | 15.89  | 76.85  | Yes |
|                                                                          | Date peak green-up at birth site* | 0.71   | 0.11  | 0.48   | 0.93   | Yes |
| <b>(g) Birth date ~ date of peak green-up at birth site</b>              |                                   |        |       |        |        |     |
| Original                                                                 | Intercept*                        | 136.86 | 8.31  | 120.32 | 153.41 | NA  |
|                                                                          | Date peak green-up at birth site* | 0.20   | 0.06  | 0.08   | 0.32   | NA  |
| Subsampled                                                               | Intercept*                        | 139.60 | 9.40  | 120.75 | 158.45 | Yes |
|                                                                          | Date peak green-up at birth site* | 0.18   | 0.07  | 0.04   | 0.32   | Yes |
| Random effect + (1 ID)                                                   | Intercept*                        | 136.73 | 8.33  | 120.60 | 153.13 | Yes |
|                                                                          | Date peak green-up at birth site* | 0.20   | 0.06  | 0.08   | 0.32   | Yes |

| <b>(h) Birth mismatch with green-up ~ green-wave surfing (Days-From-Peak)</b> |                 |       |      |        |       |     |
|-------------------------------------------------------------------------------|-----------------|-------|------|--------|-------|-----|
| Original                                                                      | Intercept       | 0.05  | 4.55 | -9.01  | 9.10  | NA  |
|                                                                               | Days-From-Peak* | -1.92 | 0.29 | -2.50  | -1.34 | NA  |
| Subsampled                                                                    | Intercept       | 2.49  | 5.05 | -7.63  | 12.61 | Yes |
|                                                                               | Days-From-Peak* | -2.13 | 0.32 | -2.78  | -1.49 | Yes |
| Random effect + (1 ID)                                                        | Intercept       | -5.31 | 4.42 | -15.01 | 4.46  | Yes |
|                                                                               | Days-From-Peak* | -1.60 | 0.28 | -2.22  | -0.99 | Yes |

\* Indicates a significant effect which was quantified as 95% confidence intervals for the coefficient estimate that does not overlap with zero.

†Indicates a singular fit, where variance estimates of random effects are equal or very close to zero.
